# Supplementary material for: Transition-metal nitride halide dielectrics for transition-metal dichalcogenide transistors
Source: Royal Society of Chemistry journal article supplement (doi:10.1039/d1nr05250k), 2021-12-14
Supplement: d1nr05250k1.pdf [file d1nr05250k1.pdf]

## SUPPLEMENTARY INFORMATION:

### Transition-Metal Nitride Halide Dielectrics for Transition-Metal Dichalcogenide Transistors

Mehrdad Rostami Osanloo<sup>1</sup>, Ali Saadat<sup>2</sup>, Maarten L. Van de Put<sup>2</sup>, Akash Laturia<sup>2</sup>,  
and William G. Vandenberghe<sup>2</sup>

<sup>1</sup> Department of Physics, The University of Texas at Dallas, Richardson, TX 75080, USA

<sup>2</sup> Department of Materials Science and Engineering, The University of Texas at Dallas,  
Richardson, TX 75080, USA

Corresponding Author: William. G. Vandenberghe ([william.vandenberghe@utdallas.edu](mailto:william.vandenberghe@utdallas.edu))

Table S1. Structural characterization of the materials under study. The TMNH dielectric materials are categorized under  $\alpha$ -form and  $\beta$ -form, with orthorhombic and trigonal crystal systems, respectively. The space group of the bulk is also listed for each material.

| Materials | Type            | Bulk Space Group | Crystal System |
|-----------|-----------------|------------------|----------------|
| ZrNCl     | $\beta$ - form  | R-3m             | Trigonal       |
| HfNCl     | $\beta$ - form  | R-3m             | Trigonal       |
| TiNCl     | $\alpha$ - form | Pmmn             | Orthorhombic   |
| ZrNBr     | $\beta$ - form  | R-3m             | Trigonal       |
| HfNBr     | $\beta$ - form  | R-3m             | Trigonal       |
| TiNBr     | $\alpha$ - form | Pmmn             | Orthorhombic   |

Table S2. Structural parameters of TMNH materials in this study. Exfoliation energy for each material is reported.

| Material | Bulk               | Monolayer |       |              | Monolayer Supercell Thickness (Å) | Exfoliation Energy (meV/Å <sup>2</sup> ) |
|----------|--------------------|-----------|-------|--------------|-----------------------------------|------------------------------------------|
|          | d <sub>i</sub> (Å) | a (Å)     | t (Å) | $\Delta$ (%) |                                   |                                          |
| ZrNCl    | 9.26               | 3.61      | 9.27  | 0.07         | 26.49                             | 16.96                                    |
| HfNCl    | 9.24               | 3.59      | 9.26  | 0.21         | 26.43                             | 17.85                                    |
| TiNCl    | 7.77               | 3.26      | 7.88  | 1.36         | 25.69                             | 15.55                                    |
| ZrNBr    | 9.80               | 3.65      | 9.82  | 0.18         | 26.83                             | 18.81                                    |
| HfNBr    | 9.80               | 3.61      | 9.82  | 0.18         | 26.77                             | 18.95                                    |
| TiNBr    | 8.38               | 3.36      | 8.40  | 0.31         | 24.96                             | 18.00                                    |

Table S3. Monolayer phonon energy for TMNHs.

| Material | Phonon Energy (meV) |       |       |       |       |       |
|----------|---------------------|-------|-------|-------|-------|-------|
| ZrNCl    | 79.28               | 72.93 | 72.93 | 70.98 | 62.57 | 62.57 |
|          | 8.94                | 3.62  | 1.82  | 21.51 | 21.51 | 19.17 |
|          | 19.17               | 14.68 | 14.68 | 0.01i | 0.05i | 0.05i |
| HfNCl    | 79.35               | 77.51 | 77.51 | 74.29 | 67.36 | 67.36 |
|          | 33.84               | 32.25 | 18.92 | 17.92 | 17.92 | 17.57 |
|          | 17.57               | 12.90 | 12.90 | 0.01i | 0.02i | 0.02i |
| TiNCl    | 79.63               | 74.12 | 73.58 | 56.76 | 49.98 | 49.80 |
|          | 42.17               | 35.81 | 26.71 | 25.94 | 24.76 | 17.44 |
|          | 15.80               | 14.28 | 13.45 | 0.02i | 0.08i | 0.09i |
| ZrNBr    | 78.83               | 70.08 | 69.95 | 69.95 | 59.51 | 59.51 |
|          | 35.25               | 25.15 | 20.34 | 20.34 | 15.90 | 14.30 |
|          | 14.30               | 9.90  | 9.90  | 0.00i | 0.00i | 0.02i |
| HfNBr    | 79.07               | 74.11 | 74.11 | 73.55 | 63.79 | 63.79 |
|          | 27.42               | 23.03 | 15.47 | 15.47 | 15.43 | 12.62 |
|          | 12.62               | 9.67  | 9.67  | 0.00i | 0.01i | 0.01i |
| TiNBr    | 78.93               | 74.07 | 73.91 | 53.63 | 49.22 | 42.76 |
|          | 33.84               | 32.51 | 27.68 | 25.63 | 17.03 | 13.30 |
|          | 10.89               | 10.02 | 7.39  | 0.01i | 0.08i | 0.11i |

Table S4. Bulk phonon energy for TMNHs.

| Material | Phonon Energy (meV) |       |       |       |       |       |
|----------|---------------------|-------|-------|-------|-------|-------|
| ZrNCl    | 80.02               | 80.00 | 75.27 | 73.00 | 73.00 | 72.63 |
|          | 72.63               | 72.62 | 72.62 | 71.15 | 71.09 | 71.09 |
|          | 62.57               | 62.51 | 62.19 | 62.14 | 62.13 | 62.09 |
|          | 39.51               | 39.43 | 39.40 | 35.15 | 35.12 | 32.10 |
|          | 23.48               | 22.62 | 22.57 | 22.28 | 22.19 | 22.15 |
|          | 22.15               | 22.06 | 22.00 | 21.04 | 20.97 | 20.93 |
|          | 20.86               | 20.47 | 20.36 | 16.31 | 16.16 | 16.09 |
|          | 15.97               | 15.82 | 15.75 | 3.28  | 3.09  | 2.69  |
|          | 1.65                | 0.46  | 0.66  | 1.03i | 2.31i | 2.96i |
| HfNCl    | 80.12               | 80.12 | 77.56 | 77.56 | 77.56 | 77.56 |
|          | 77.56               | 77.56 | 75.24 | 74.46 | 74.46 | 74.45 |
|          | 67.40               | 67.40 | 67.39 | 67.39 | 67.39 | 67.39 |
|          | 34.83               | 34.42 | 34.42 | 33.35 | 33.35 | 30.30 |
|          | 19.75               | 19.21 | 19.21 | 18.60 | 18.60 | 18.46 |
|          | 18.46               | 18.46 | 18.46 | 18.13 | 18.13 | 18.13 |
|          | 18.13               | 17.93 | 17.93 | 13.16 | 13.16 | 13.03 |
|          | 13.03               | 13.03 | 13.03 | 3.14  | 3.14  | 1.23  |
|          | 1.23                | 1.23  | 1.23  | 0.02i | 0.02i | 0.02i |
| TiNCl    | 79.82               | 76.95 | 74.20 | 56.57 | 49.82 | 49.28 |
|          | 43.10               | 35.81 | 26.30 | 24.51 | 24.21 | 15.78 |
|          | 15.27               | 14.31 | 11.77 | 0.02i | 0.10i | 0.16i |
| ZrNBr    | 79.91               | 79.91 | 74.86 | 70.75 | 70.75 | 70.75 |
|          | 70.67               | 70.67 | 70.66 | 70.66 | 70.66 | 70.66 |
|          | 60.22               | 60.22 | 60.22 | 60.22 | 60.02 | 60.02 |
|          | 35.43               | 35.43 | 35.33 | 26.95 | 26.95 | 25.50 |
|          | 20.39               | 20.39 | 20.36 | 20.36 | 20.36 | 20.36 |
|          | 19.53               | 18.91 | 18.91 | 16.90 | 16.90 | 16.90 |
|          | 16.90               | 16.73 | 16.73 | 14.24 | 14.24 | 14.11 |
|          | 14.11               | 14.11 | 14.11 | 6.81  | 6.81  | 5.56  |
|          | 5.56                | 5.56  | 5.56  | 1.33i | 1.93i | 1.93i |

Table S4 (Cont.). Bulk phonon energy for TMNHs.

| Material | Phonon Energy (meV) |       |       |       |       |       |
|----------|---------------------|-------|-------|-------|-------|-------|
| HfNBr    | 79.84               | 79.84 | 74.61 | 74.23 | 74.23 | 74.22 |
|          | 74.22               | 74.22 | 74.22 | 73.77 | 73.76 | 73.76 |
|          | 63.89               | 63.89 | 63.89 | 63.89 | 63.88 | 63.88 |
|          | 27.66               | 27.58 | 27.58 | 23.67 | 23.67 | 21.95 |
|          | 16.34               | 15.72 | 15.72 | 15.56 | 15.56 | 15.55 |
|          | 15.55               | 15.55 | 15.55 | 12.86 | 12.86 | 12.86 |
|          | 12.86               | 12.78 | 12.78 | 9.96  | 9.96  | 9.81  |
|          | 9.81                | 9.81  | 9.81  | 3.04  | 3.04  | 1.14  |
|          | 1.14                | 1.14  | 1.14  | 0.01i | 0.01i | 0.01i |
| TiNBr    | 78.88               | 73.87 | 71.16 | 53.67 | 49.52 | 42.84 |
|          | 33.64               | 32.05 | 27.91 | 25.90 | 17.99 | 13.52 |
|          | 10.86               | 10.84 | 8.32  | 0.00i | 0.03i | 0.14i |

Table S5. In-plane dielectric constant components ( $x$  and  $y$ ). Among six TMNH dielectrics materials, only TiNCl and TiNBr are anisotropic since the  $x$  and  $y$  components are considerably different.

| Material | Monolayer ( $\epsilon_\infty$ ) |       | Monolayer ( $\epsilon_0$ ) |       | Bulk ( $\epsilon_\infty$ ) |       | Bulk ( $\epsilon_0$ ) |       |
|----------|---------------------------------|-------|----------------------------|-------|----------------------------|-------|-----------------------|-------|
|          | x                               | y     | x                          | y     | x                          | y     | x                     | y     |
| ZrNCl    | 6.23                            | 6.23  | 15.85                      | 15.85 | 6.24                       | 6.24  | 15.64                 | 15.72 |
| HfNCl    | 5.65                            | 5.65  | 13.69                      | 13.69 | 5.67                       | 5.67  | 13.61                 | 13.61 |
| TiNCl    | 15.54                           | 9.89  | 157.26                     | 35.31 | 16.13                      | 10.10 | 159.31                | 36.00 |
| ZrNBr    | 6.69                            | 6.69  | 15.30                      | 15.30 | 6.72                       | 6.72  | 14.87                 | 14.88 |
| HfNBr    | 6.10                            | 6.10  | 13.18                      | 13.18 | 6.12                       | 6.12  | 13.16                 | 13.16 |
| TiNBr    | 16.70                           | 10.27 | 128.04                     | 35.07 | 17.16                      | 10.42 | 132.22                | 35.20 |

Table S6. Bandgap and electron affinity values for TMNH materials in this study. Bandgap values are calculated by two methods: Perdew-Burke-Ernzerof (PBE) and Heyd-Scuseria-Ernzerhof (HSE). Electron affinity values are also calculated by HSE method.

| Material | PBE Band Gap (eV) |           | HSE Band Gap (eV) | Electron Affinity (eV) |
|----------|-------------------|-----------|-------------------|------------------------|
|          | Bulk              | Monolayer | Monolayer         | Monolayer              |
| ZrNCl    | 1.77              | 1.91      | 2.89              | 4.53                   |
| HfNCl    | 2.19              | 2.37      | 3.36              | 4.07                   |
| TiNCl    | 0.56              | 0.57      | 1.55              | 5.60                   |
| ZrNBr    | 1.45              | 1.65      | 2.59              | 4.45                   |
| HfNBr    | 1.83              | 2.03      | 2.99              | 4.01                   |
| TiNBr    | 0.56              | 0.57      | 1.53              | 5.43                   |

Table S7. Bandgap and electron affinity values for TMDs. Bandgap values are calculated using Heyd-Scuseria-Ernzerhof (HSE). Electron affinity values are also calculated by HSE method.

| Material          | HSE Band Gap (eV) | Electron Affinity (eV) |
|-------------------|-------------------|------------------------|
|                   | Monolayer         | Monolayer              |
| WSe <sub>2</sub>  | 1.60              | 3.55                   |
| WS <sub>2</sub>   | 1.91              | 3.91                   |
| MoSe <sub>2</sub> | 1.63              | 3.96                   |
| MoS <sub>2</sub>  | 1.97              | 4.30                   |
| MoTe <sub>2</sub> | 1.19              | 3.80                   |

Table S8. Leakage current values of TMNH dielectrics under study in combination with five TMDs for *p*-MOS applications. We listed hBN for the porous of comparison. TiNCl and TiNBr cannot insulate the current when they are combined with WSe<sub>2</sub> and WS<sub>2</sub> channel materials (shown by stars) due to their band alignment.

| TMD               | TMNH  | Leakage Current Density (A/cm <sup>2</sup> ) |                        |                        |                       |
|-------------------|-------|----------------------------------------------|------------------------|------------------------|-----------------------|
|                   |       | Thermionic                                   | Tunneling (VB)         | Tunneling (CB)         | Total                 |
| WSe <sub>2</sub>  | ZrNCl | 3.04×10 <sup>-26</sup>                       | 2.63×10 <sup>-20</sup> | 5.84×10 <sup>3</sup>   | 5.84×10 <sup>3</sup>  |
|                   | HfNCl | 2.11×10 <sup>-26</sup>                       | 2.05×10 <sup>-20</sup> | 3.63×10 <sup>-2</sup>  | 3.63×10 <sup>-2</sup> |
|                   | TiNCl | 2.74×10 <sup>-21</sup>                       | 3.06×10 <sup>-12</sup> | *                      | *                     |
|                   | ZrNBr | 1.85×10 <sup>-20</sup>                       | 4.49×10 <sup>-15</sup> | 4.10×10 <sup>2</sup>   | 4.10×10 <sup>2</sup>  |
|                   | HfNBr | 7.73×10 <sup>-20</sup>                       | 1.76×10 <sup>-14</sup> | 1.84×10 <sup>-3</sup>  | 1.84×10 <sup>-3</sup> |
|                   | TiNBr | 1.08×10 <sup>-18</sup>                       | 9.02×10 <sup>-11</sup> | *                      | *                     |
|                   | hBN   | 3.44×10 <sup>-16</sup>                       | 4.62×10 <sup>2</sup>   | 7.53×10 <sup>-8</sup>  | 4.62×10 <sup>2</sup>  |
| WS <sub>2</sub>   | ZrNCl | 5.34×10 <sup>-15</sup>                       | 2.64×10 <sup>-9</sup>  | 7.16×10 <sup>-5</sup>  | 7.16×10 <sup>-5</sup> |
|                   | HfNCl | 5.72×10 <sup>-15</sup>                       | 2.12×10 <sup>-9</sup>  | 1.19×10 <sup>-11</sup> | 2.14×10 <sup>-9</sup> |
|                   | TiNCl | 4.82×10 <sup>-10</sup>                       | 1.66×10 <sup>-3</sup>  | 3.02×10 <sup>7</sup>   | 3.2×10 <sup>7</sup>   |
|                   | ZrNBr | 3.26×10 <sup>-9</sup>                        | 1.38×10 <sup>-4</sup>  | 8.50×10 <sup>-7</sup>  | 1.39×10 <sup>-4</sup> |
|                   | HfNBr | 1.36×10 <sup>-8</sup>                        | 4.20×10 <sup>-4</sup>  | 1.10×10 <sup>-13</sup> | 4.20×10 <sup>-4</sup> |
|                   | TiNBr | 1.90×10 <sup>-7</sup>                        | 5.64×10 <sup>-2</sup>  | 1.46×10 <sup>6</sup>   | 1.46×10 <sup>6</sup>  |
|                   | hBN   | 6.06×10 <sup>-5</sup>                        | 1.68×10 <sup>5</sup>   | 9.53×10 <sup>-12</sup> | 1.68×10 <sup>5</sup>  |
| MoSe <sub>2</sub> | ZrNCl | 7.37×10 <sup>-19</sup>                       | 7.13×10 <sup>-13</sup> | 7.01×10 <sup>-2</sup>  | 7.01×10 <sup>-2</sup> |
|                   | HfNCl | 5.13×10 <sup>-19</sup>                       | 5.67×10 <sup>-13</sup> | 3.68×10 <sup>-8</sup>  | 3.68×10 <sup>-8</sup> |
|                   | TiNCl | 6.65×10 <sup>-14</sup>                       | 2.56×10 <sup>-6</sup>  | *                      | *                     |
|                   | ZrNBr | 4.50×10 <sup>-13</sup>                       | 6.09×10 <sup>-8</sup>  | 1.56×10 <sup>-3</sup>  | 1.56×10 <sup>-3</sup> |
|                   | HfNBr | 1.88×10 <sup>-12</sup>                       | 2.03×10 <sup>-7</sup>  | 6.28×10 <sup>-10</sup> | 2.04×10 <sup>-7</sup> |
|                   | TiNBr | 2.61×10 <sup>-11</sup>                       | 8.80×10 <sup>-5</sup>  | 6.53×10 <sup>7</sup>   | 6.53×10 <sup>7</sup>  |
|                   | hBN   | 4.19×10 <sup>-4</sup>                        | 2.51×10 <sup>5</sup>   | 2.23×10 <sup>-10</sup> | 2.51×10 <sup>5</sup>  |
| MoS <sub>2</sub>  | ZrNCl | 1.91×10 <sup>-7</sup>                        | 5.13×10 <sup>-3</sup>  | 1.88×10 <sup>-11</sup> | 5.13×10 <sup>-3</sup> |
|                   | HfNCl | 1.33×10 <sup>-7</sup>                        | 4.23×10 <sup>-3</sup>  | 4.03×10 <sup>-19</sup> | 4.23×10 <sup>-3</sup> |
|                   | TiNCl | 1.72×10 <sup>-2</sup>                        | 1.21×10 <sup>2</sup>   | 1.14×10 <sup>4</sup>   | 1.15×10 <sup>4</sup>  |
|                   | ZrNBr | 1.17×10 <sup>-1</sup>                        | 7.42×10 <sup>1</sup>   | 6.10×10 <sup>-14</sup> | 7.43×10 <sup>1</sup>  |
|                   | HfNBr | 4.86×10 <sup>-1</sup>                        | 1.83×10 <sup>2</sup>   | 1.06×10 <sup>-21</sup> | 1.83×10 <sup>2</sup>  |
|                   | TiNBr | 4.77                                         | 3.30×10 <sup>3</sup>   | 1.36×10 <sup>2</sup>   | 3.44×10 <sup>3</sup>  |
|                   | hBN   | 2.17×10 <sup>3</sup>                         | 5.16×10 <sup>6</sup>   | 1.61×10 <sup>-14</sup> | 5.16×10 <sup>6</sup>  |
| MoTe <sub>2</sub> | ZrNCl | 7.74×10 <sup>-16</sup>                       | 4.63×10 <sup>-10</sup> | 1.84×10 <sup>5</sup>   | 1.84×10 <sup>5</sup>  |
|                   | HfNCl | 5.39×10 <sup>-16</sup>                       | 3.71×10 <sup>-10</sup> | 3.14                   | 3.14                  |
|                   | TiNCl | 4.98×10 <sup>-11</sup>                       | 4.23×10 <sup>-4</sup>  | *                      | *                     |
|                   | ZrNBr | 4.72×10 <sup>-10</sup>                       | 2.72×10 <sup>-5</sup>  | 1.92×10 <sup>4</sup>   | 1.92×10 <sup>4</sup>  |
|                   | HfNBr | 1.97×10 <sup>-9</sup>                        | 8.42×10 <sup>-5</sup>  | 2.31×10 <sup>-1</sup>  | 2.31×10 <sup>-1</sup> |
|                   | TiNBr | 2.74×10 <sup>-8</sup>                        | 1.45×10 <sup>-2</sup>  | *                      | *                     |
|                   | hBN   | 7.10×10 <sup>-19</sup>                       | 9.87×10 <sup>1</sup>   | 5.82×10 <sup>-7</sup>  | 9.87×10 <sup>1</sup>  |

Table S9. Comparison of bandgaps, electron affinities, and polarizability between values calculated in this study and extracted from Ref. [35]. We also added the values calculated in several other studies for the purpose of comparison.

| Material | HSE Band Gap (eV) |      |                                    | Electron Affinity (eV) |      | Polarizability (Å) |      |
|----------|-------------------|------|------------------------------------|------------------------|------|--------------------|------|
|          | Our Study         | C2DB | Others                             | Our Study              | C2DB | Our Study          | C2DB |
| ZrNCl    | 2.89              | 3.08 | 2.87 [1],<br>2.93 [2],<br>2.70 [3] | 4.53                   | 4.35 | 0.59               | 0.59 |
| HfNCl    | 3.36              | 3.45 | 3.37 [2]                           | 4.07                   | 3.99 | 0.59               | 0.51 |
| TiNCl    | 1.55              | 2.09 | 1.41 [4],<br>1.41 [5]              | 5.60                   | 4.89 | 0.50               | 0.50 |
| ZrNBr    | 2.59              | 2.76 | 2.60 [1],<br>2.52 [3]              | 4.45                   | 4.21 | 0.65               | 0.59 |
| HfNBr    | 2.99              | 3.05 | -                                  | 4.01                   | 3.88 | 0.65               | 0.57 |
| TiNBr    | 1.53              | 2.08 | 1.39 [4],<br>1.39 [5]              | 5.43                   | 4.68 | 0.55               | 0.54 |

Table S10. Lattice mismatch between five TMDs used in this study and six TMNHs.

| TMD               | TMNH  | Lattice Mismatch (%) |
|-------------------|-------|----------------------|
| WSe <sub>2</sub>  | ZrNCl | 8.78                 |
|                   | HfNCl | 7.81                 |
|                   | TiNCl | 1.04                 |
|                   | ZrNBr | 9.80                 |
|                   | HfNBr | 8.80                 |
|                   | TiNBr | 2.00                 |
| WS <sub>2</sub>   | ZrNCl | 12.39                |
|                   | HfNCl | 11.45                |
|                   | TiNCl | 2.96                 |
|                   | ZrNBr | 13.37                |
|                   | HfNBr | 12.40                |
|                   | TiNBr | 5.87                 |
| MoSe <sub>2</sub> | ZrNCl | 12.66                |
|                   | HfNCl | 11.73                |
|                   | TiNCl | 3.26                 |
|                   | ZrNBr | 13.64                |
|                   | HfNBr | 12.68                |
|                   | TiNBr | 6.17                 |
| MoS <sub>2</sub>  | ZrNCl | 8.23                 |
|                   | HfNCl | 7.25                 |
|                   | TiNCl | 1.65                 |
|                   | ZrNBr | 9.25                 |
|                   | HfNBr | 8.25                 |
|                   | TiNBr | 1.40                 |
| MoTe <sub>2</sub> | ZrNCl | 1.29                 |
|                   | HfNCl | 0.24                 |
|                   | TiNCl | 9.33                 |
|                   | ZrNBr | 2.40                 |
|                   | HfNBr | 1.32                 |
|                   | TiNBr | 6.04                 |



## References

- [1] Hao, Qi-Dong, et al. "Quasiparticle band structures and optical properties of monolayer ZrNX (X= Cl, Br, I) under exciton effect." *Solid State Communications* 322 (2020): 114049, doi: 10.1016/j.ssc.2020.114049.
- [2] Yun, Won Seok, and Jae Dong Lee. "Two-dimensional semiconductors ZrNCl and HfNCl: Stability, electric transport, and thermoelectric properties." *Scientific reports* 7.1 (2017): 1-9, doi: 10.1038/s41598-017-17590-w.
- [3] Wiebeler, Hendrik. *A linear scaling DFT-Method and high-throughput calculations for p-type transparent semiconductors*. Diss. Universitätsbibliothek, 2020.
- [4] Liang, Yan, et al. "Novel titanium nitride halide TiNX (X= F, Cl, Br) monolayers: potential materials for highly efficient excitonic solar cells." *Journal of Materials Chemistry A* 6.5 (2018): 2073-2080, doi: 10.1039/C7TA09662C.
- [5] Zhou, Liujiang, et al. "Computational dissection of two-dimensional rectangular titanium mononitride TiN: auxetics and promises for photocatalysis." *Nano letters* 17.7 (2017): 4466-4472, doi: 10.1021/acs.nanolett.7b01704.
- [6] Tian, Tian, et al. "Electronic polarizability as the fundamental variable in the dielectric properties of two-dimensional materials." *Nano letters* 20.2 (2019): 841-851, doi: 10.1021/acs.nanolett.9b02982.
